# Supplementary material for: Insights into Antibody-Mediated Alphavirus Immunity and Vaccine Development Landscape
Source: MDPI journal article supplement (doi:10.3390/microorganisms9050899), 2021-04-22
Supplement: s1 [file s1]

# E1 glycoprotein

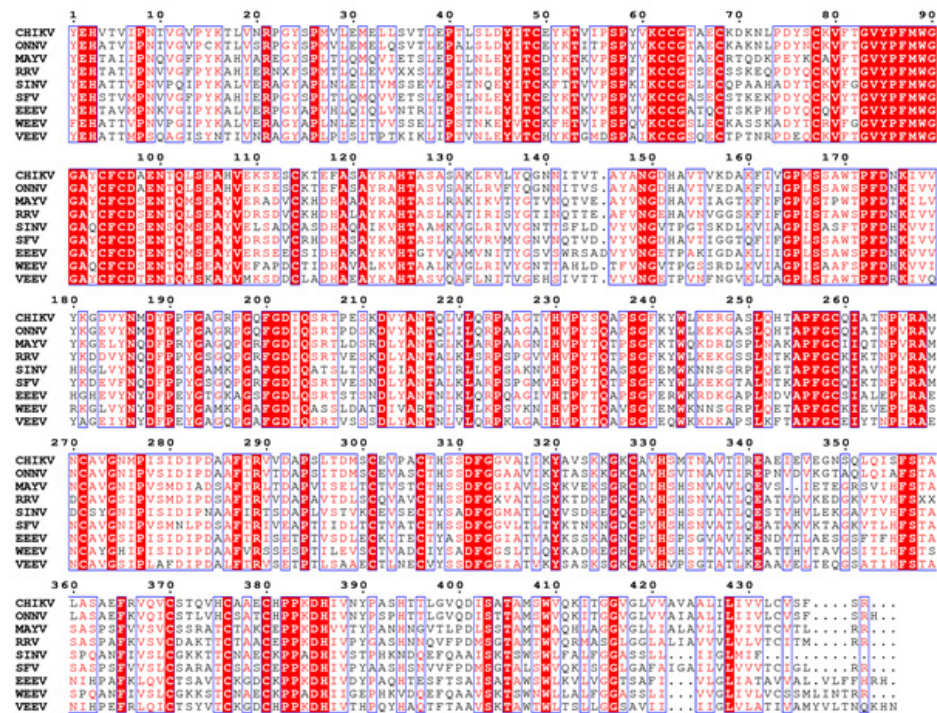

# E2 glycoprotein

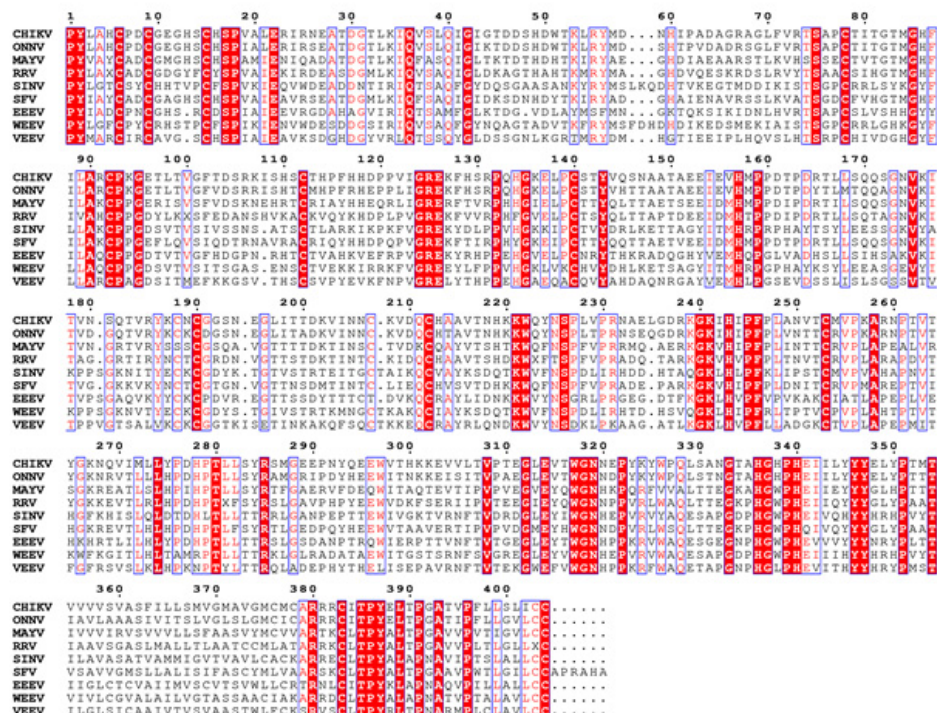

**Figure S1. Alignment of E1 and E2 amino acid sequences of arthritogenic and encephalitic alphaviruses.** Alignment of E1 and E2 glycoproteins of reference arthritogenic (CHIKV: NC\_004162.2, ONNV: NC\_001512.1, MAYV: NC\_003417.1, RRV: NC\_001544.1, SINV: NC\_001547.1, SFV: NC\_003215.1) and encephalitic (EEV: NC\_003899.1, WEEV: NC\_003908.1, VEEV: NC\_001449.1) alphaviruses. 100% conserved residues are highlighted in red (white letters), red letters indicate homologous residues. Blue boxes demarcate highly similar regions between sequences, black letters are non-conserved residues. Reference sequences were aligned in PROMALS3D and ESPript 3.0. was used to prepare the figure.
